# Supplementary material for: Tailoring adsorbents for levodopa detection: a DFT study on Pt-encapsulated fullerene systems
Source: Royal Society of Chemistry journal article supplement (doi:10.1039/d4ra03526g), 2024-01-01
Supplement: d4ra03526g1.pdf [file d4ra03526g1.pdf]

### Supporting Information

Wendy Maxakato<sup>a</sup>, Innocent Benjamin, Miracle N. Ogbogu<sup>c</sup>, Henry O. Edet<sup>b</sup>, Ismail O. Amodu<sup>d</sup>, and Adedapo S. Adeyinka<sup>a</sup>

**Table S1.** Results for some QTAIM parameters; Ellipticity bond, Electron localization function (ELF) and Eigenvalues

| $\epsilon$ | ELF   | $\lambda_1$ | $\lambda_2$ | $\lambda_3$ | $\lambda_1/\lambda_3$ |
|------------|-------|-------------|-------------|-------------|-----------------------|
| 0.016      | 0.950 | 0.395       | -0.435      | -0.428      | -0.923                |
| 1.290      | 0.188 | -0.448      | 0.411       | -0.469      | 0.955                 |
| 0.0544     | 0.950 | 0.378       | -0.454      | -0.430      | -0.879                |
| 0.168      | 0.326 | 0.805       | -0.121      | -0.142      | -5.669                |
| 0.052      | 0.762 | 0.117       | -0.197      | -0.208      | -0.563                |
| 0.024      | 0.970 | 0.212       | -0.522      | -0.509      | -0.417                |
| 1.003      | 0.930 | -0.108      | 0.198       | -0.217      | 0.498                 |
| 0.019      | 0.421 | 0.143       | -0.272      | -0.277      | -0.516                |
| 0.679      | 0.162 | 0.307       | -0.477      | -0.284      | -1.081                |
| 0.897      | 0.214 | 0.593       | -0.844      | -0.445      | -1.333                |
| 0.052      | 0.743 | 0.169       | -0.374      | -0.394      | -0.429                |
| 1.406      | 0.159 | 0.495       | -0.601      | -0.250      | -1.980                |
| 0.157      | 0.931 | 0.279       | -0.475      | -0.549      | -0.509                |
| 0.017      | 0.130 | -0.810      | 0.315       | -0.797      | 1.016                 |
| 0.050      | 0.850 | 0.410       | -0.450      | -0.472      | -0.869                |
